# Supplementary material for: POMC neurons control fertility through differential signaling of MC4R in kisspeptin neurons
Source: eLife journal article supplement (doi:10.7554/elife.100722), 2024-09-11
Supplement: fig4-data2 [file elife-100722-fig4-data2-v1.pdf]

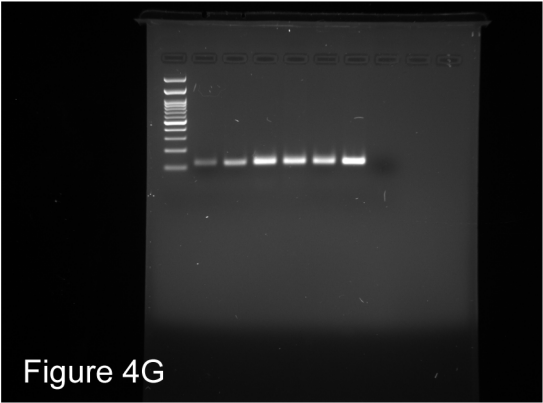

Figure 4G
