# Supplementary material for: POMC neurons control fertility through differential signaling of MC4R in kisspeptin neurons
Source: eLife. 2025 Jul 17;13:RP100722. doi: 10.7554/eLife.100722 (PMC12270483; doi:10.7554/eLife.100722)
Supplement: Source data 1. [file elife-100722-data1.xlsx]

## Sheet: Figure 1 source data
	Figure 1A:
	% Vaginal openning
	PND	Ctrls	Kiss1-MC4RKO
	21	0	4.16667
	22	0	8.33333
	23	5.26316	20.8333
	24	26.3158	54.1667
	25	36.8421	75
	26	68.4211	91.6667
	27	73.6842	91.6667
	28	78.9474	91.6667
	29	84.2105	95.8333
	30	94.7368	100
	31	100	100
	Figure 1A:
	VO
		Ctrls	Kiss1-MC4RKO
		31	30
		30	29
		23	25
		24	26
		24	25
		24	23
		25	24
		28	26
		29	26
		26	24
		26	24
		26	24
		26	25
		24	26
		30	25
		26	24
		27	25
		26	22
		25	23
			24
			23
			24
			24
			21
	Figure 1B:
	% First Estrus
	PND	Ctrls	Kiss1-MC4RKO
	25	0	4.16667
	26	0	16.6667
	27	10.5263	37.5
	28	15.7895	45.8333
	29	15.7895	45.8333
	30	15.7895	45.8333
	31	21.0526	50
	32	26.3158	58.3333
	33	26.3158	66.6667
	34	31.5789	66.6667
	35	42.1053	75
	36	47.3684	79.1667
	37	47.3684	79.1667
	38	63.1579	79.1667
	39	68.4211	83.3333
	40	78.9474	87.5
	41	78.9474	87.5
	42	84.2105	87.5
	43	84.2105	87.5
	44	84.2105	91.6667
	45	84.2105	91.6667
	46	89.4737	91.6667
	47	89.4737	95.8333
	48	89.4737	95.8333
	49	89.4737	95.8333
	50	89.4737	95.8333
	51	89.4737	95.8333
	52	89.4737	100
	53	89.4737	100
	54	89.4737	100
	55	89.4737	100
	56	94.7368	100
	57	100	100
	Figure 1B:
	FE
		Ctrls	Kiss1-MC4RKO
		56	52
		57	39
		35	27
		27	47
		27	26
		31	36
		28	25
		32	26
		34	28
		40	27
		39	33
		36	33
		46	27
		40	32
		35	40
		42	44
		38	32
		38	35
		38	31
			27
			28
			35
			27
			26
	Figure 1C:
		Ctrls	Kiss1-MC4RKO
		15.1	14
		13.65	10.5
		14.25	13.45
		13.75	14.5
		13.25	13.6
		12.7	14.15
		11.9	12.1
		12.4	12
		12.6	13.3
		11.7	13.2
		11.3	11.2
		11.9	11.3
		13.1	11.3
		13	11.7
		12.7	12.6
			11.4
			11.5
			10.1
			13.9
	Figure 1D:
	Agrp:
		p10	p15	p22	p30
	Mouse 1	1.34935	1.512	1.671	0.572705
	Mouse 2	1.37525	1.38171	1.95864	0.65553
	Mouse 3	1.52231	2.47836	2.00638	0.812255
	Mouse 4	1.17606	1.3708	1.27623	0.487558
	Mouse 5	0.54129	1.45853	1.5553	0.6753
	Mouse 6	0.556071	1.64406	1.36828
	Pomc:
		p10	p15	p22	p30
	Mouse 1	1.43289	2.25676	1.04246	2.38116
	Mouse 2	2.1849	2.21214	1.8683	0.429059
	Mouse 3	0.78921	2.16337	0.350795	1.33334
	Mouse 4	0.792477	1.59775	0.938424	1.44858
	Mouse 5	0.648444	2.7676	1.27195	2.08651
	Mouse 6	0.787595	1.65954	0.921456
	Mc4r:
		p10	p15	p22	p30
	Mouse 1	1.31866	2.36046	0.924499	0.38809
	Mouse 2	1.68498	1.56246	1.30034	0.172303
	Mouse 3	0.552811	0.353883	0.655027	0.583168
	Mouse 4	0.789713	0.690096	0.993385	0.331082
	Mouse 5	1.04681	0.854441	0.908312	0.710285
	Mouse 6	0.98483	0.766521	0.613949
	Mc3r:
		p10	p15	p22	p30
	Mouse 1	0.350533	1.94051	0.834637	0.280798
	Mouse 2	1.20091	1.69091	1.56453	0.204126
	Mouse 3	2.13926	3.30385	0.978073	0.408107
	Mouse 4	1.0438	0.84009	1.57719	0.245742
	Mouse 5	0.979201	1.02932	0.466221	0.480385
	Mouse 6	1.08645	1.27914	1.02539

## Sheet: Figure 2  source data
	Figure 2 A:
	PND	Ctrls																										Kiss1-MC4RKO
	30	15.6	13.9			13.5	13.4	12.3	12.9	15.3	12.3	14.3	13.9	12.4	12.2	11.4	11.7	10.6	9.6	10.3	10	10.8	9.5	9.5	10.2	10.9	11.1	17.3	16.6	16.5	16.7	15.4	17.7	18.5	19.9	16.8	14.1	16.8	16.9	15.4	13.3	14.8	15.7	14.7	15.8	13.7	12.2	14.6	15.2
	40	19.6	17	19	19.2	18.4	18.1	16.7	16	17.2	14.2	18	16.3	14.9	16.3	16.1	14.8	14.8	14.2	14.5	14.7	15.1	14.4	14.2	15.4	16.2	13.7	1.5	18	18.3	17.9	16.5	20.3	20.9	21.4	18.8	16.2	18.6	18.4	17	15.4	17.3	17.1	15.3	17	16.8	17.9	16.1	16.8
	50	21.9	19.1	19.6	20.5	20.4	19.6	18.3	18.6	19.8	17.4	20.1	17.1	16.9	18.4	18.6	17.2	15.7	16.7	16	17	17	17.8	16.6	17.5	18.6	15.5	19.7	18.4	18.8	18.7	16.8	22.4	23	24.1	20.6	17	19	19	19.4	16.4	19.9	18.5	17.3	19.6	18.2	19.2	17.4	18.3
	60	24.8	20	20.3	20.9	21.3	21.3	19.8	19	20.6	16.3	20.5	18.6	19	19.1	19.2	18.9	18.8	18.4	17.5	19.2	18.2	19.7	19.1	19.3	20.9	18.2	21.2	19.8	19.7	19.4	16.8	24.8	25.2	23.7	23.4	17.5	19.8	19.2	20.8	18.5	21.8	19.8	19	20.3	19.5	21.5	19.2	20
	70	23.6	20.4	21.3	23.2	21.8	23.7	21.1	20.6	23.3	17	20	19.5	20.3	19.8	21.1	19.5	18.7	20.5	19.5	20.4	19.8	19.4	19.4	20.1	21.7	19.1	23.7	21.2	19	20.1	17.6	25	27.3	24.5	25	17.8	21.6	20.6	22.6	19.5	22.4	22	19.7	21.8	20.5	22.9	20.9	20.5
	80	24.3	21.2	23.4	22.4	22.5	23.9	20.6	20.8	24.8	17.9	22.4	20.8	21.9	21.5	22.6	21	19.3	21.5	20.8	21.2	20.9	21.1	20.7	20.6	22.3	20.5	22.8	24.1	20.9	21.8	18	27	31.8	26.4	25.2	19.6	22.4	20.4	24.2	20.8	22.4	22.6	20.1	22.6	22.2	21.1	21.6	20.5
	90	26.2	20.3	22	22.6	23.1	24	22.3	22.8	24	18.1	23.4	21	23.2	22.7	21.6	21.2	19.9	22.7	22.3					21.1	23	20.9	25.7	22.6	21	22	18.2	27.8	31.9	26.2	27.5	20.1	23.4	21.4	27.2	22.2	24.1	23.5	20.5	23.6	22.9	23.4	22.5	20.8
	100			23.3	24.8	22.9	24.2	21.6	22.2	22.1	19.2	21.5	21.4	23.8	25.5	22.6	22	20.9	23.6	22.8					23	25.8		27.2	24.9	21.6	23.8	18.8	31.5	32.3	27.9	28.9	18.9	22.2	21	27.1	22.9	24.1	22.5	21.2	22.5	24.8	25.2	23.9	21.1
	110	25.4	22	25.2	25.6	24.1	28.1	21.4	21.7	26.8	19.3	23.8	23.2	24.5	24.8	27.7	22.9	22.2	23	22.1					22.4	24.5		27.7	25.8	22.3	23.1	19.9	32.4	35.3	30.8	32.3	20	22.4	22.5			25.8	24.7	22	23.3	24.7	26.1		22.9
	120	29.6	21.3	24	24.9	24.8	29	22.9	25.7	27.4	19.5	23.9	23.8	23.6	29.2	23.2	22.7	22.9	23.8	23.8					22.2	25.5		29.9	28.9	23.2	27.9	20.4	33.5	36.7								26.4	24.4	22.7	25.1		30.1		22.7
	130	25.6	22.8	25.7	27								25		27	24.2	22.8	22.8	23.5	23.1					23.7	27.9		30.8				20.4	34	37.9	35.7	34	19.9	22.2	23.5			27.2	25.8	22.8	25.8		30.6		21.8
	140	29.5	24.4	25.8	27	26.7	31.6	24.5	27.1	27.8	19.8	24.4	20.6		27.5	24.9	23.6	21.9	24.3	23.4					24.7	29.6									38.1	25.1	21.4	27.1	21.8			26.7	25.3	23.4	26.2		30.5		22.5
	150					29.1	33.7	25.7	36.3	26.4	21.7	23.8	24.2		28.3	27.2	23.8	22.8	23.3	22.4					23.3	29.3
	Figure 2 B:
		Ctrls					Kiss1-MC4RKO
	D/M	10	4	4	6	6	10	8	13	12	13
	P	2	2	2	1	3	2	2	0	1	0
	E	3	9	9	8	5	2	4	1	1	2
	Figure 2 E:
	AUC:
		Ctrls	Kiss1-MC4RKO
		67.89	89.96
		73.23	82.46
		109.2	78.99
		65.51	67.43
		79.98	123.6
		87.17	97.73
		57.66
	Figure 2 F:
	LH amplitude:
		Ctrls	Kiss1-MC4RKO
		0.5175	0.5865
		0.5145	0.5325
		0.693	0.52425
		0.51525	0.43275
		0.56175	0.86775
		0.59775	0.5985
		0.348
	Figure 2 G:
	Basal LH:
		Ctrls	Kiss1-MC4RKO
		0.27375	0.41775
		0.333	0.3795
		0.462	0.399
		0.288	0.3105
		0.36225	0.56775
		0.384	0.48525
		0.27525
	Figure 2 H:
	Number of pulses:
		Ctrls	Kiss1-MC4RKO
		3	3
		1	0
		2	2
		5	3
		1	3
		3	1
		0
	Figure 2 I:
	Pdyn/Hprt:
		Ctrls	Kiss1-MC4RKO
		0.967169	0.673187
		1.00072	0.882404
		1.0332	0.765507
			0.73626
			0.91006
			0.722312
	Figure 2 J:
	Kiss1/Hprt:
		Ctrls	Kiss1-MC4RKO
		1.18218	0.480844
		0.961315	1.25766
		0.879934	0.716483
			0.445187
			1.14077
			0.4574
	Figure 2 K:
	Tac2/Hprt:
		Ctrls	Kiss1-MC4RKO
		1.18558	1.22508
		0.802106	1.07984
		1.05157	0.95878
			1.06593
			1.34274
			0.917419
	Figure 2 L:
	Tac3/Hprt:
		Ctrls	Kiss1-MC4RKO
		0.982499	0.939585
		0.840812	0.978932
		1.21051	0.673511
			0.944468
			0.99092
			0.712104
	Figure 2 M:
		Ctrls						Kiss1-MC4RKO
	8 am	0.71145	0.85938	0.8253	0.86625	0.60108		0.83208	0.87999	0.44592	0.40419	0.62031	0.51309
	7 pm	10.8915	3.5586	5.1378	14.6511	5.8221		3.0375	4.2816	0.34305	0.261024	5.7162	0.42216
	Figure 2 O:
		Ctrls	Kiss1-MC4RKO
		2	0
		3	2
		4	0
		3	1
		2	1
	Figure 2 P:
		Ctrls	Kiss1-MC4RKO
		0	2
		0	2
		0	2
		1	2
		1	0
	Figure 2 Q:
		Ctrls	Kiss1-MC4RKO
		83.6	51.4
		37.3	70.4
		38.9	77.2
		118.4	30.3
		36
	Figure 2 R:
		Ctrls	Kiss1-MC4RKO
		364.16	220.08
		267.51	297.77
		332.54	438.9
		328.41	452.61
		316.51
	Figure 2 S:
		Ctrls	Kiss1-MC4RKO
		21	20
		21	27
		21	22
		20	22
		21	67
		21	41
		22	22
		20	35
			22
			25
	Figure 2 T:
		Ctrls	Kiss1-MC4RKO
		9	8
		8	8
		9	5
		7	8
		9	8
		9	6
		8	8
		8	5
		9	4
[truncated: 9 more columns]

## Sheet: Figure 3  source data
	Figure 3A:
	% vagnal openning
		Ctrls	Kiss1-cre:MC4R-LoxTB	MC4R-LoxTB
	24	28.5714	0	0
	25	35.7143	0	0
	26	42.8571	18.75	18.75
	27	42.8571	31.25	31.25
	28	57.1429	43.75	43.75
	29	71.4286	50	56.25
	30	78.5714	62.5	68.75
	31	85.7143	62.5	68.75
	32	100	81.25	87.5
	33	100	87.5	87.5
	34	100	93.75	87.5
	35	100	93.75	87.5
	36	100	100	87.5
	37	100	100	93.75
	38	100	100	100
	Figure 3A:
	VO
		Ctrls	Kiss1-cre:MC4R-LoxTB	MC4R-LoxTB
		32	29	26
		29	30	32
		30	30	38
		26	33	30
		24	34	37
		25	28	27
		29	32	26
		31	36
		32	26
		28	27
		28	26
		24
		24
		24
	Figure 3B:
	% First estrus
		Ctrls	Kiss1-cre:MC4R-LoxTB	MC4R-LoxTB
	26	0	6.25	12.5
	27	0	18.75	12.5
	28	0	25	12.5
	29	0	31.25	25
	30	0	37.5	31.25
	31	0	43.75	31.25
	32	10	43.75	31.25
	33	50	50	43.75
	34	60	56.25	50
	35	70	62.5	62.5
	36	70	68.75	62.5
	37	80	68.75	68.75
	38	90	75	75
	39	90	87.5	93.75
	40	100	100	100
	41	100	100	100
	42	100	100	100
	43	100	100	100
	44	100	100	100
	45	100	100	100
	Figure 3B:
	FE
		Ctrls	Kiss1-cre:MC4R-LoxTB	MC4R-LoxTB
		38	28	27
		36	32	40
		41	37	40
		33	40	41
		39	41	40
		35	36	31
		34	39	27
		34	41
		34	29
		34	30
			27
	Figure 3C:
		Ctrls	Kiss1-cre:MC4R-LoxTB	MC4R-LoxTB
		12.8	15.5	14
		12.9	14	14.8
		15.2	17	16.3
		12.8	16	14.5
		10.9	14.7	18
		13.4	14.5	15.7
		12.1	13.1	15.1
		14.4	17.5
		14.1	16.6
		14.5	16
		13	16
		12.3
		14.4
		13.2
	Figure 3D:
	PND	Ctrls							Kiss1-cre:MC4R-LoxTB											MC4R-LoxTB
	30	10.7	14.3	15.6				17.4		14.6	17.3	17.7	18.3	18.9	17	21.6	18.4	18.9	15.7	17.1	14.7	15.9	15.3	14.3	20.3
	40	14.9	14.9	16.6					21.4	18.5	18.3	20	20.8	20.2	18.3	22.2	21.5	21.8	17.8	18.2	18.4	16.5	19.5	19.5	21.1
	50	15.9	15.1	17.9	20.2	16.3	18.2		23.3	21.6	19.4	20.7	22.8	23.6	22.1	25.1	22.2	22.7	20	19.3	20.3	19.7	22.9	21.8	24.4
	60	16.9	15.7	18.4	21.6	17.6	19.7	20.9	25.7	24.2	20.4	22.03	25.1	25.3	24.7	26.1	21.9	25.2	22.6	21.8	21.6	21.5	24.4	24.4	26.5
	70	17.6	16.2	19.4	22	18	19.4		27.8	29	24	24.7	27.7	26.2	26.3	29.3	22.6	25.9	24.3	23.9	25.3	24.8	27.8	27.2	29.2
	80	18.2	16.8	20.5	22.4	19.2	20.2	22.1	30.6	32	24.8	27.1	29.5	27.7	28.8	36.6	23.9			25.2	27.8	27	29.9	28.5	35.9
	90	18.7	17.5	20.6	23.9	19.8	21.8	24.4	34.3	35.1	26.8	29.1				43.5	25.5			26	29.6	30.3	31.9		41.4
	100	20.6	17.9	21	24.9	20.8	22.3	23.1	36.5	38.7	28.2	30.2					27.7			26.4	31.8	31.1
	110	19.8	18.9	20.8	27.5	21.8	23.7	26.2	40.7	40.9	30.8									27.6	33.9	35.2
	Figure 3E:
		Ctrls					Kiss1-cre:MC4R-LoxTB					MC4R-LoxTB
	D/M	7	8	9	11	11	7	7	11	8	7	14	12	12	12
	P	3	2	0	0	0	1	0	1	2	0	0	0	0	0
	E	5	5	6	3	3	7	8	3	5	8	1	3	3	2
	Figure 3G:
	AUC:
		Ctrls	Kiss1-cre:MC4R-LoxTB	MC4R-LoxTB
		99.99	62.43	109.1
		71.75	88.29	114.8
		90.08	73.92	111
		59.61	47.61	103.3
			80.84
	Figure 3H:
	LH amplitude:
		Ctrls	Kiss1-cre:MC4R-LoxTB	MC4R-LoxTB
		0.76725	0.38925	0.723
		0.531	0.564	0.74175
		0.603	0.4725	0.75075
		0.42675	0.41175	0.71025
			0.576
	Figure 3I:
	Basal LH:
		Ctrls	Kiss1-cre:MC4R-LoxTB	MC4R-LoxTB
		0.47775	0.29325	0.50325
		0.29775	0.402	0.5265
		0.47925	0.36375	0.501
		0.23025	0.16125	0.40875
			0.39225
	Figure 3J:
	Number of pulses:
		Ctrls	Kiss1-cre:MC4R-LoxTB	MC4R-LoxTB
		4	3	3
		4	3	3
		5	1	3
		5	4	3
				2
	Figure 3L:
		Ctrls	Kiss1-cre:MC4R-LoxTB	MC4R-LoxTB
		7	4	4
		7	0	0
		2	0	0
		3	0	0
		2	0	0
	Figure 3M:
		Ctrls	Kiss1-cre:MC4R-LoxTB	MC4R-LoxTB
		83.6	45.6	54.2
		37.3	28.9	11.8
		38.9	21.8	14.3
		118.4	29.3	32
		36	30.5	29.1
				29.6
	Figure 3N:
		Ctrls	Kiss1-cre:MC4R-LoxTB	MC4R-LoxTB
		364.16	144.99	181.64
		267.51	152.6	168.54
		332.54	126.05	217.7
		328.41	110.13	131.72
		316.51	184.81	144.99
			162.97	59.27

## Sheet: Figure 4 source data
	Figure 4 C ARC MTII Current
	OVX	OVX+E
	-4.6398	-1.6
	-1.3987	-5.74
	-5.1719	-0.18
	1.11	-0.04
	2.833	-1.05
	-2.576	-0.75
		-3.3
		-6
		-5.5
		0.4
		-4.2
		-8.75
	Figure 4J POMC to ARC Kiss PPR
	OVX	OVX+E
	0.719653	0.813953
	1.00496	0.271084
	0.197485	0.462791
	0.52381	0.203061
	0.903226	0.262295
	0.5	1.06897
	0.953846	0.251908
	0.748031	0.438462
	1.20106	1.15581
		0.657895
		0.888889
		0.496202
		0.2925
		0.471264
		0.754386
		0.19391
		0.346591
		0.534308
		0.481402
		0.360335
		0.414368

## Sheet: Figure 5  source data
	Figure 5G AVPV MTII current
	OVX	OVX+E	OVX+STX
	8.5	6.97	-5.52
	4.9	5.06	-2.28
	1.2	6.01	-3.01
	19.8	1.8	-6.33
	21.44	1.49	2.37
	8.23	7.4	1.23
	9.28	2.22	-1.7
	18.12	8.08
	Figure 5H mESPC frequency change
	OVX	OVX+E	OVX+STX
	96.3	200	63.4
	91.8	145	66.8
	111.7	36.9	72.8
	95.9	215.9	58
	123.8	148	128.9
	98.4	33.7	59.8
		108.4	92.3
		80.4
	Figure 5I mEPSC amplitude change
	OVX	OVX+E	OVX+STX
	36.5	56.8	100.9
	600	64.8	111.9
	70.7	60.2	108.2
	23.3	121.6	97.3
	68.1	86.3	78.9
	26.8	59.9	83.4
		26.7	101.8
		54.5
